# Supplementary material
Source: MDPI journal article supplement (https://www.mdpi.com/1424-8247/14/11/1098)
Supplement: s1 [file s1]

# Supporting Information

## HPLC/ESI-MS and NMR analysis of chemical constituents in bioactive extract from the root nodule of *Vaccinium emarginatum*

Hsiang-Ming Huang <sup>1†</sup>, Chien-Yi Ho <sup>2,3†</sup>, Geng-Ruei Chang <sup>4</sup>, Wei-Yau Shia <sup>5</sup>, Cheng-Hung Lai <sup>5</sup>, Chih-Hao Chao <sup>6,\*</sup> and Chao-Min Wang <sup>4,\*</sup>

<sup>1</sup> Neurosurgery Department, China Medical University Hsinchu Hospital, Hsinchu 302, Taiwan; d10190168@gmail.com (H.-M.H.)

<sup>2</sup> Department of Biomedical Imaging and Radiological Science, China Medical University, Taichung 404, Taiwan; samsam172@yahoo.com.tw (C.-Y.H.)

<sup>3</sup> Division of Family Medicine, Physical Examination Center, and Department of Medical Research, China Medical University Hsinchu Hospital, Hsinchu 302, Taiwan; samsam172@yahoo.com.tw (C.-Y.H.)

<sup>4</sup> Department of Veterinary Medicine, National Chiayi University, 580 Xinmin Road, Chiayi 600023, Taiwan; grchang@mail.ncyu.edu.tw (G.-R.C.)

<sup>5</sup> Department of Veterinary Medicine, National Chung-Hsing University, 145 XingDa Road, Taichung 402, Taiwan; vmwyshia@nchu.edu.tw (W.-Y.S.); chlai@dragon.nchu.edu.tw (C.-H.L.)

<sup>6</sup> Division of chest medicine, Attending physician of Chang Bing Show Chwan Memorial Hospital, 6 Lugong Road, Lukang Township, Changhua 505029, Taiwan

<sup>†</sup> These authors contributed equally to this work

<sup>\*</sup> Correspondence: leowang@mail.ncyu.edu.tw (C.-M.W.); drchao028@gmail.com (C.-H.C)

Tel.: +886-5-2732970 (C.-M.W.); +886- 975-617918 (C.-H.C)

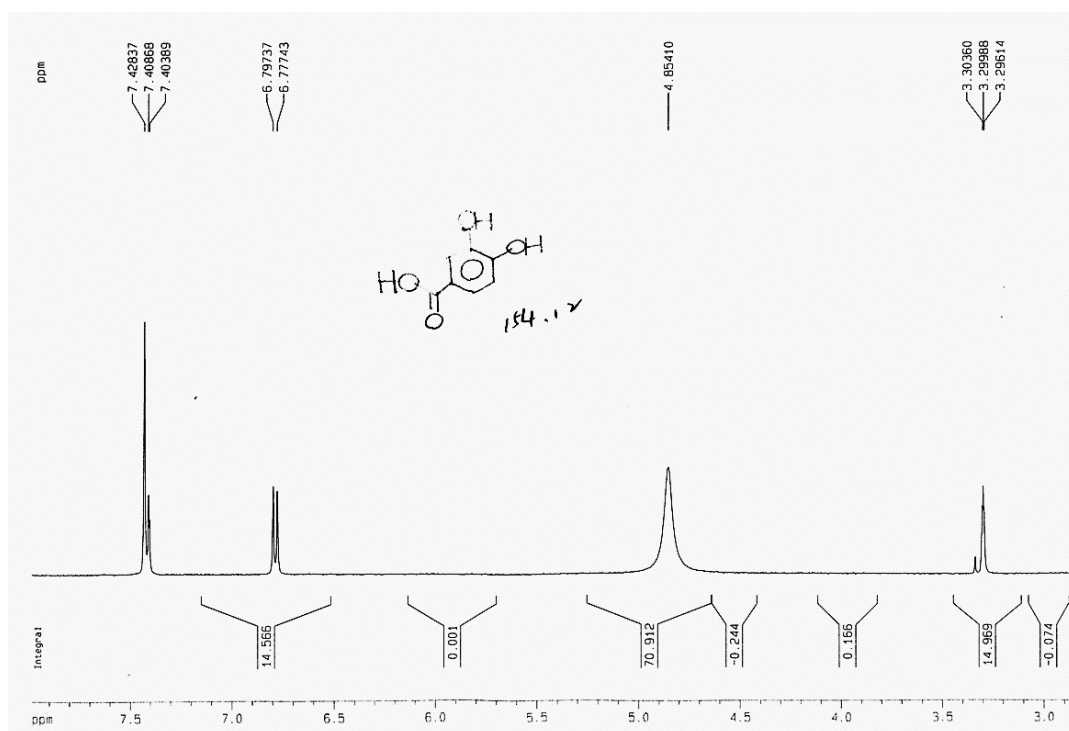

Figure S1.  $^1\text{H}$  NMR spectrum of compound **1**.

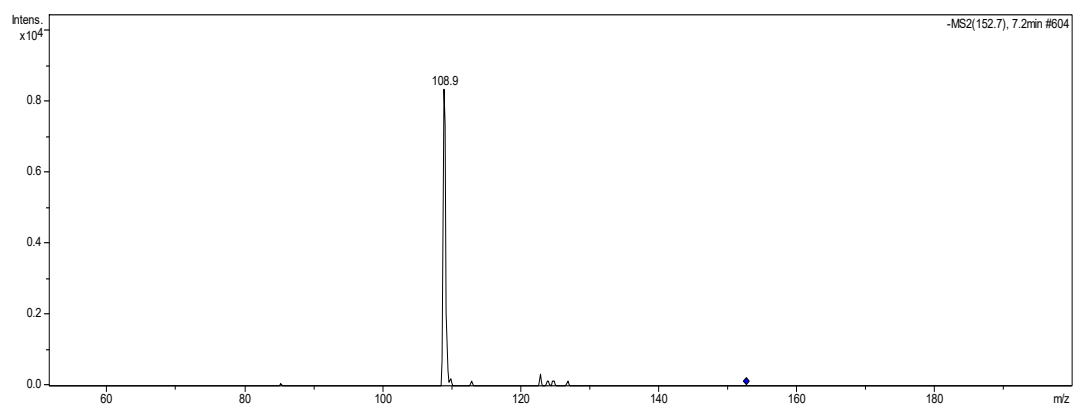

Figure S2. MS/MS spectrum of compound **1**.

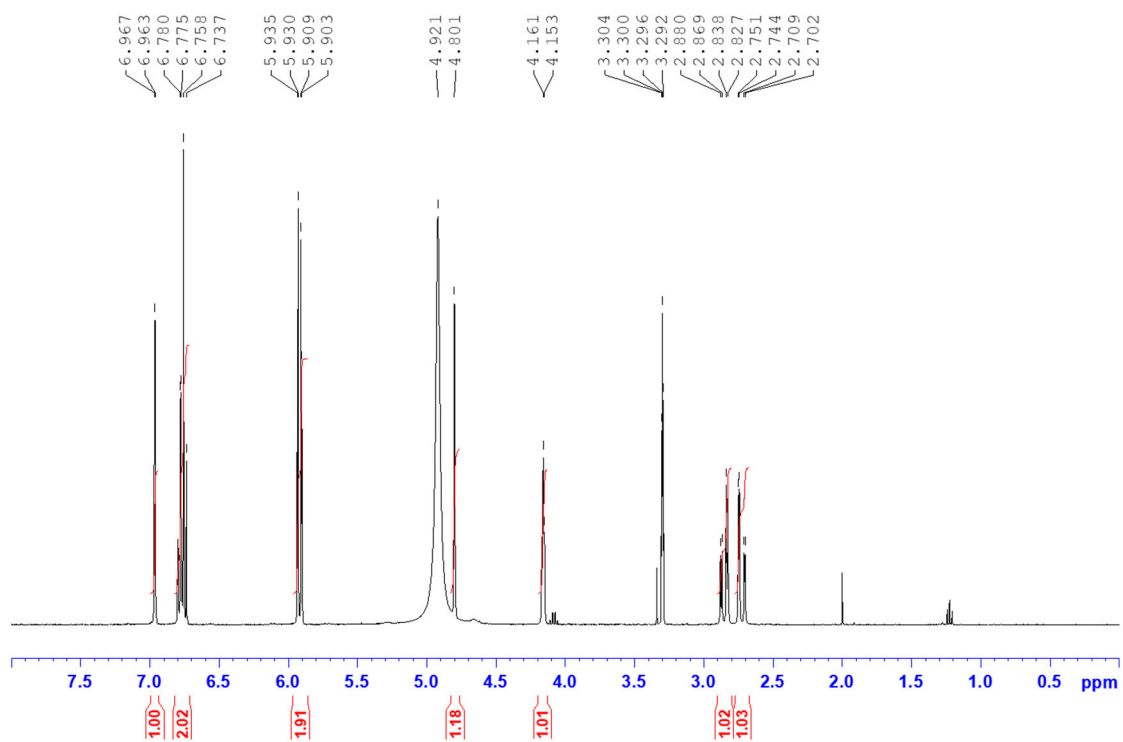

Figure S3.  $^1\text{H}$  NMR spectrum of compound **2**.

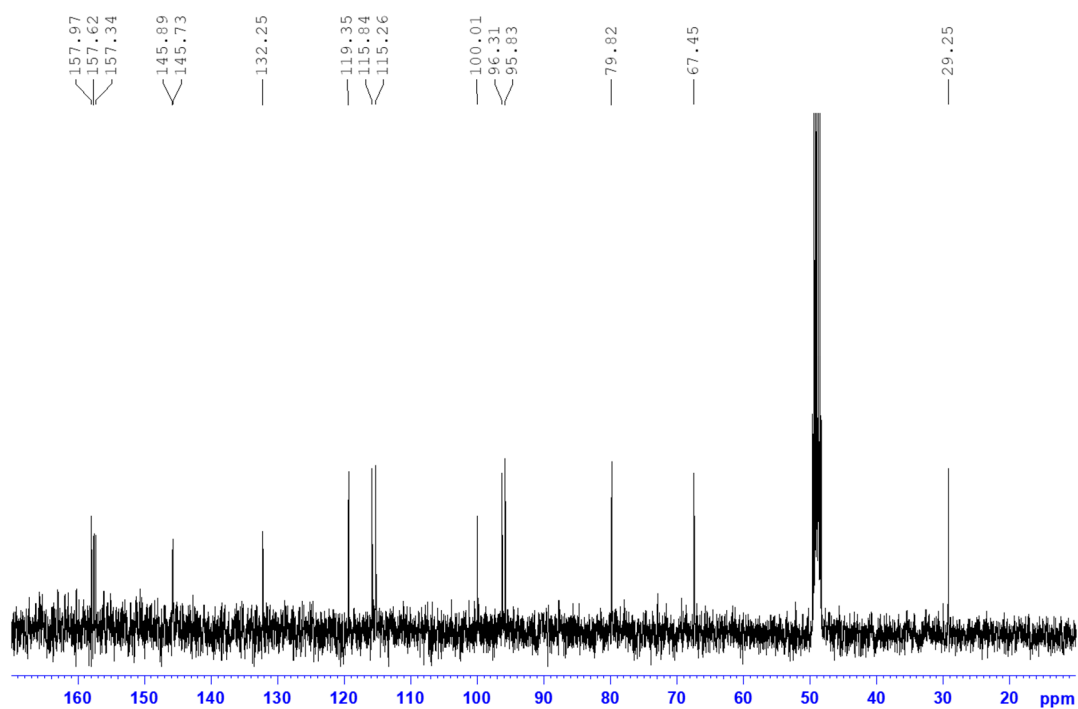

Figure S4.  $^{13}\text{C}$  NMR spectrum of compound **2**.

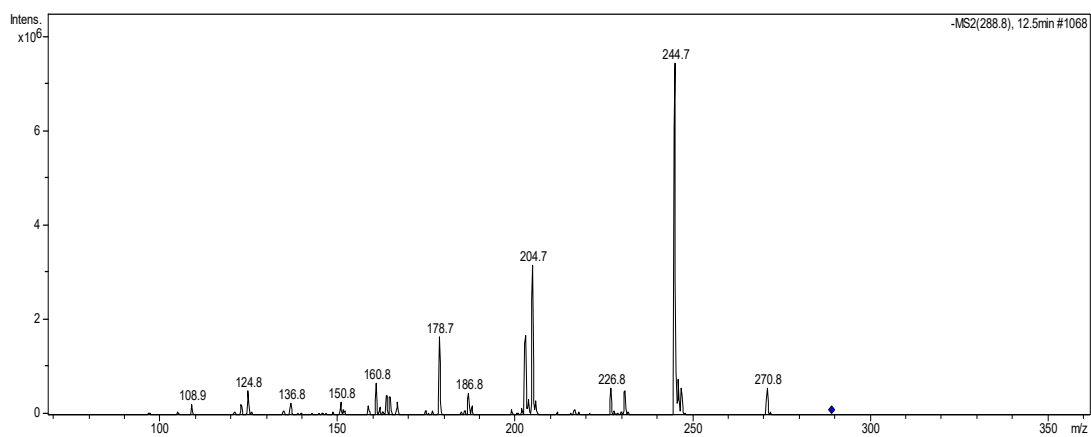

Figure S5. MS/MS spectrum of compound 2.

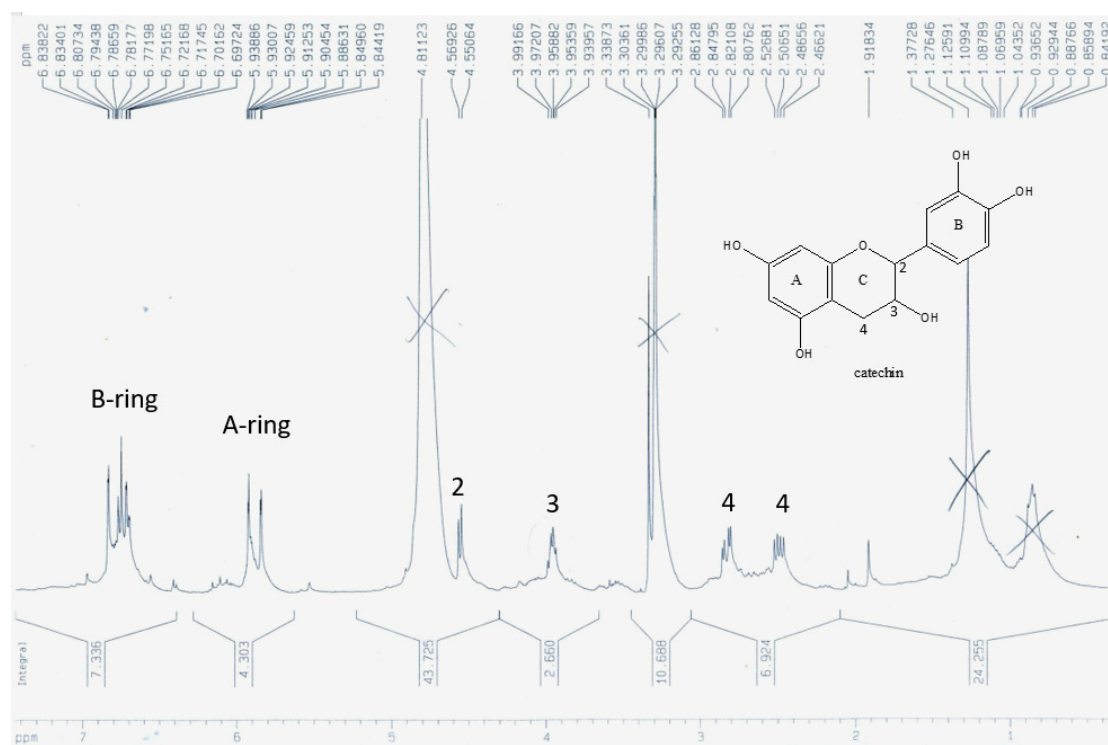

Figure S6.  $^1\text{H}$  NMR spectrum of compound 3.

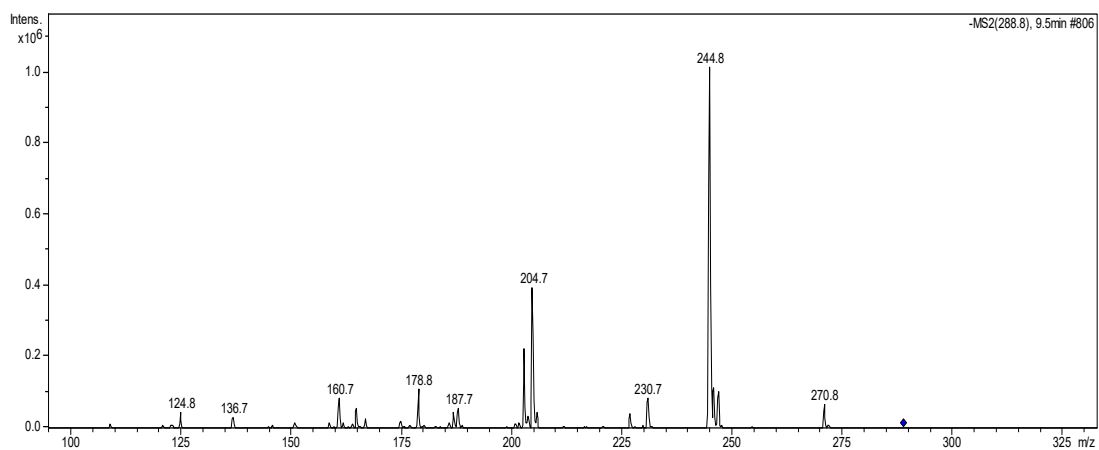

Figure S7. MS/MS spectrum of compound **3**.

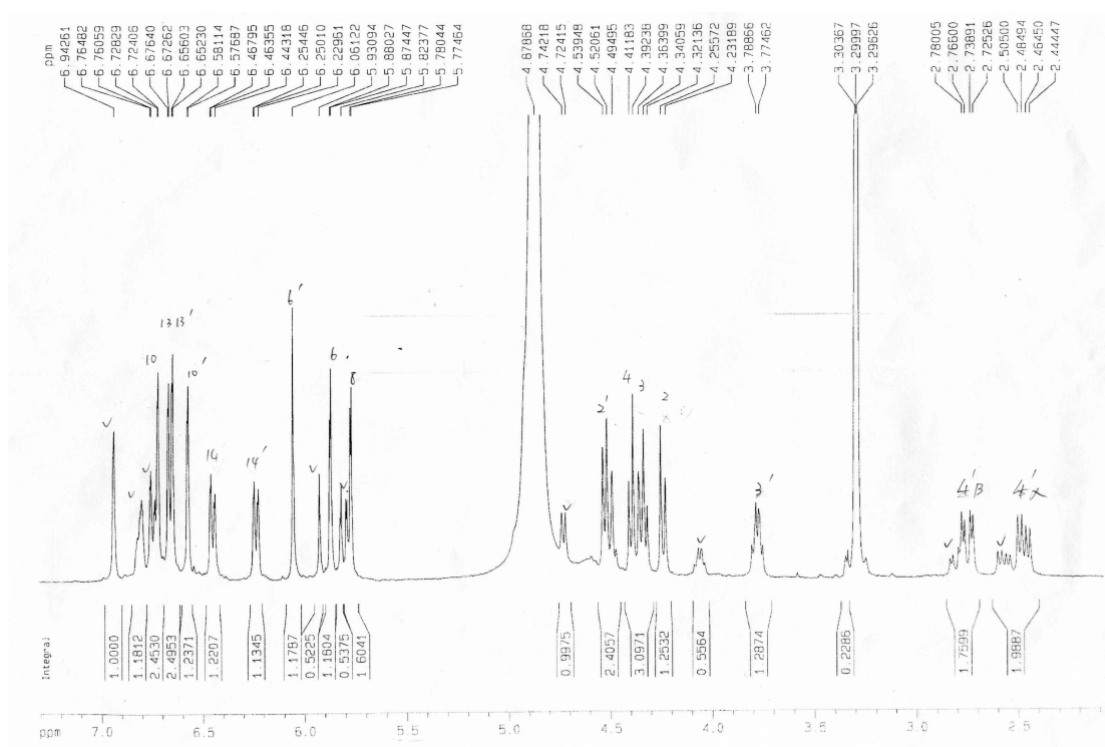

Figure S8.  $^1\text{H}$  NMR spectrum of compound **4**.

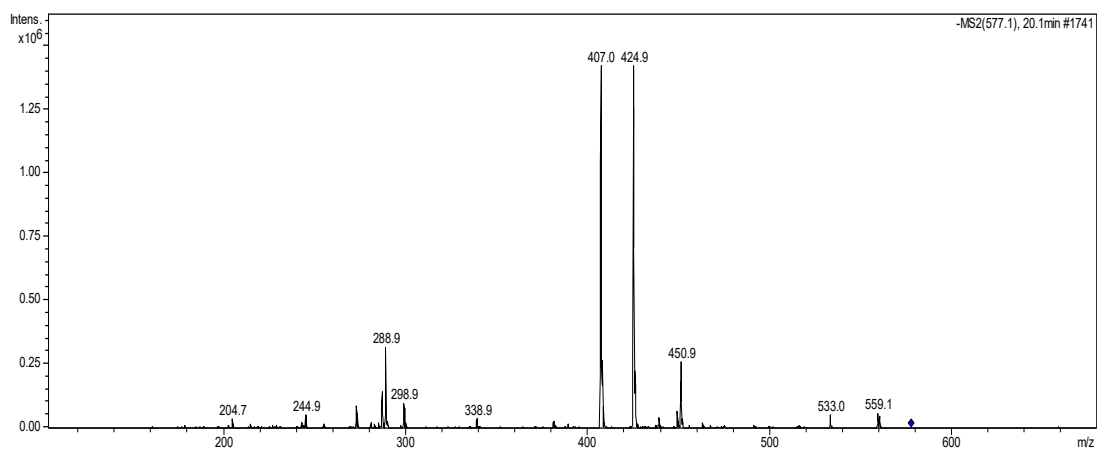

Figure S9. MS/MS spectrum of compound 4.

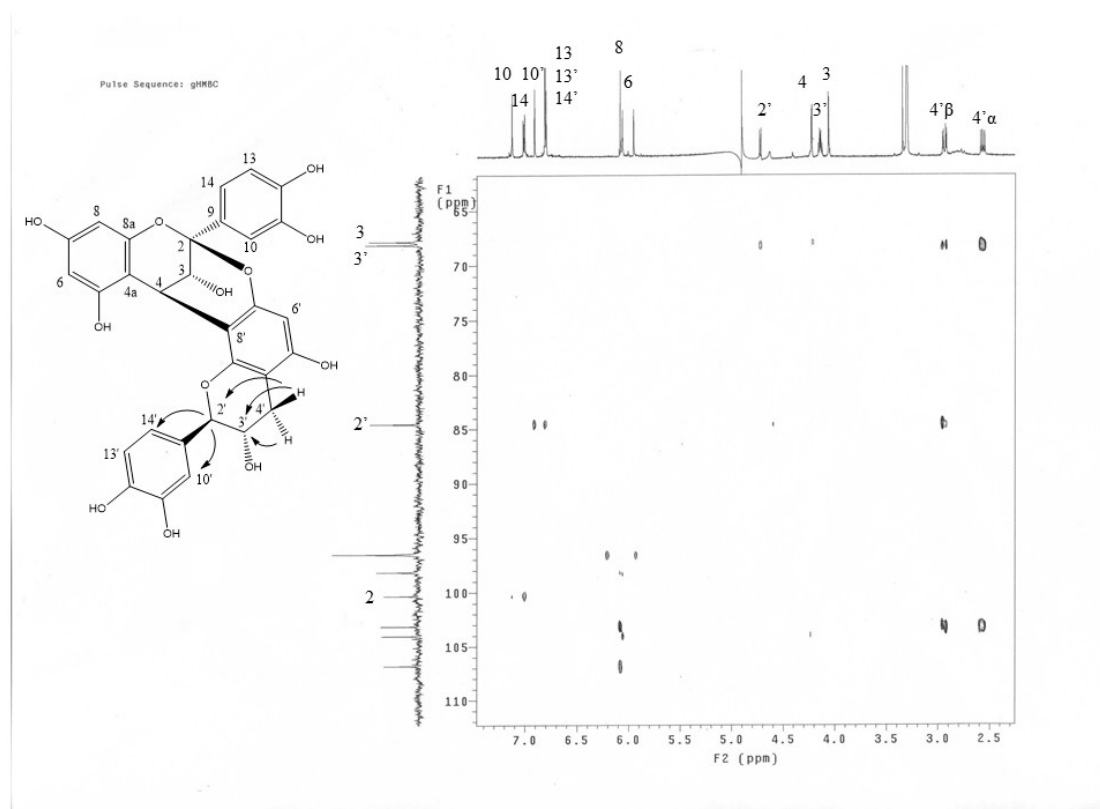

Figure S10. HMBC spectrum of compound 5.

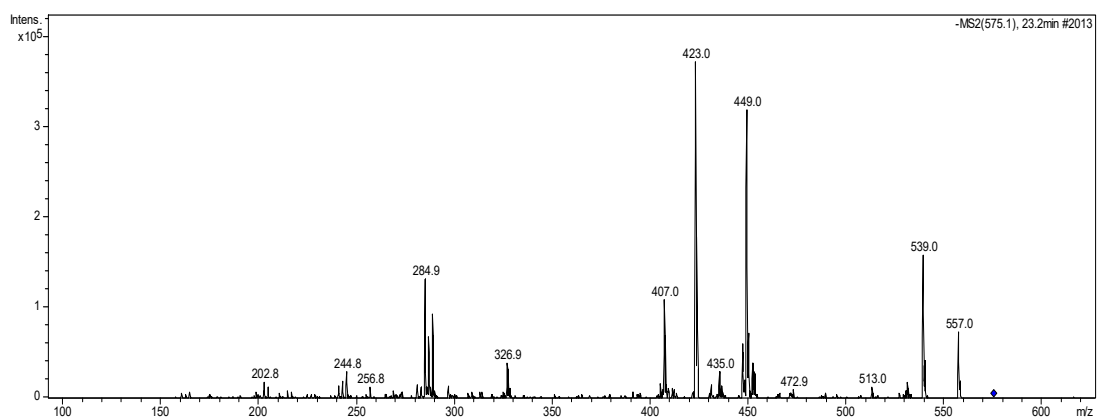

Figure S11. MS/MS spectrum of compound 5.

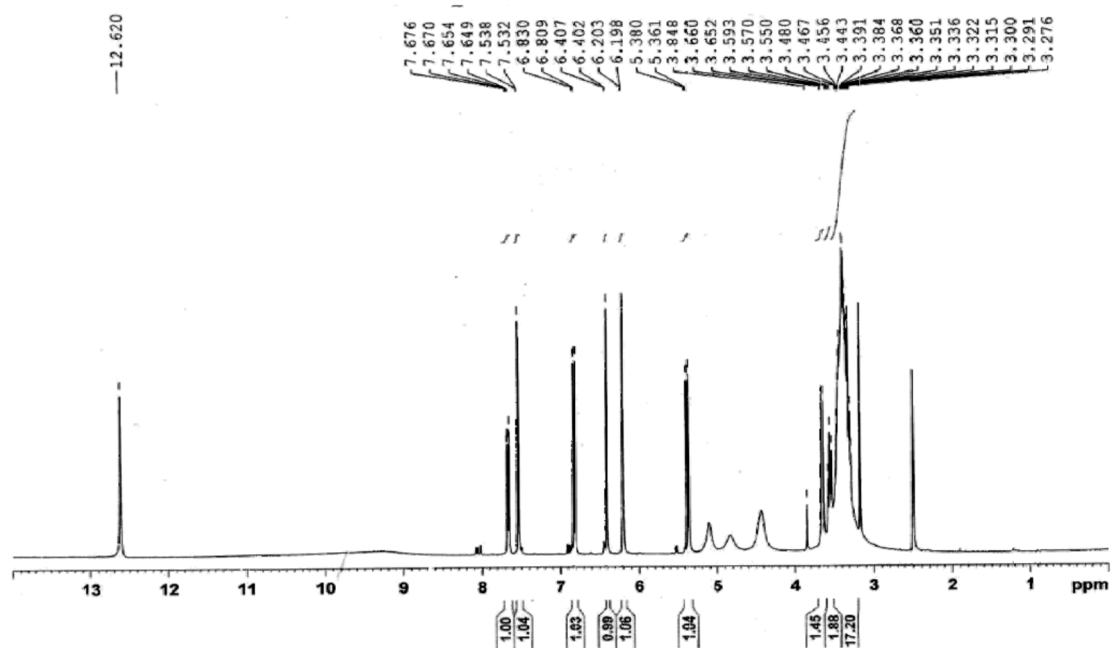

Figure S12. <sup>1</sup>H NMR spectrum of compound 6.

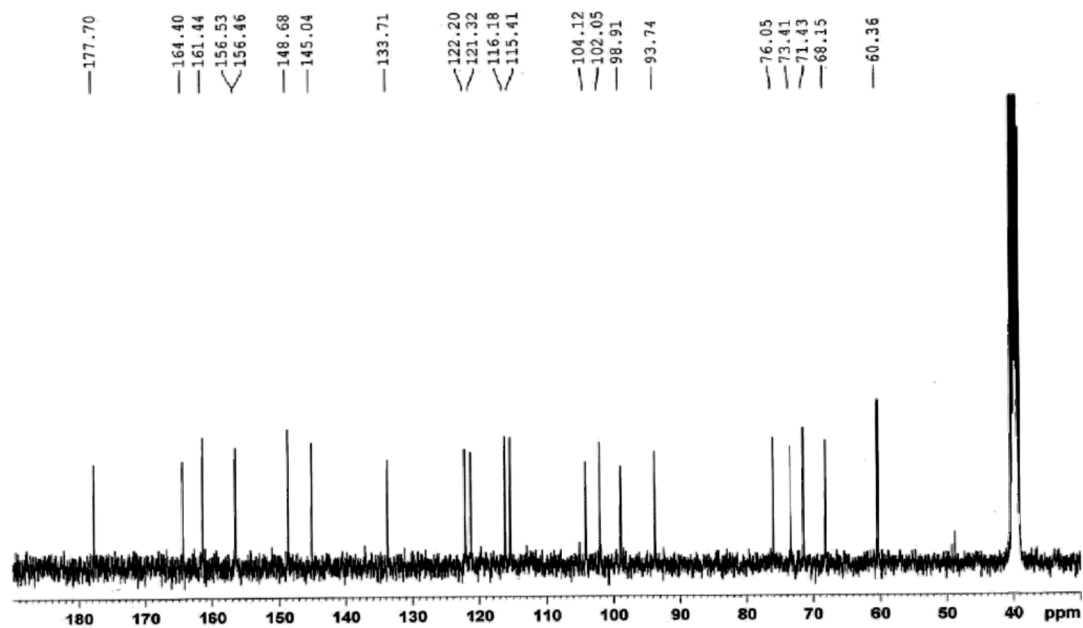

Figure S13.  $^{13}\text{C}$  NMR spectrum of compound 6.

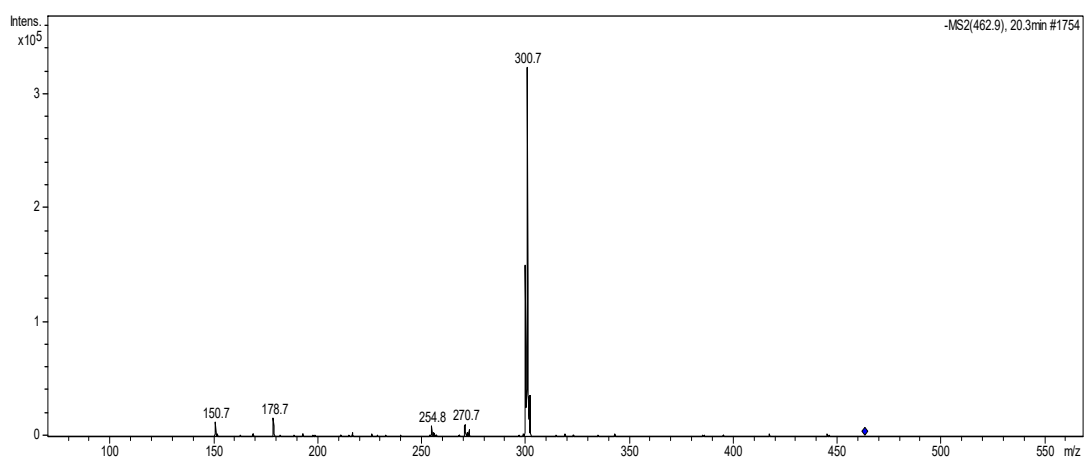

Figure S14. MS/MS spectrum of compound 6.



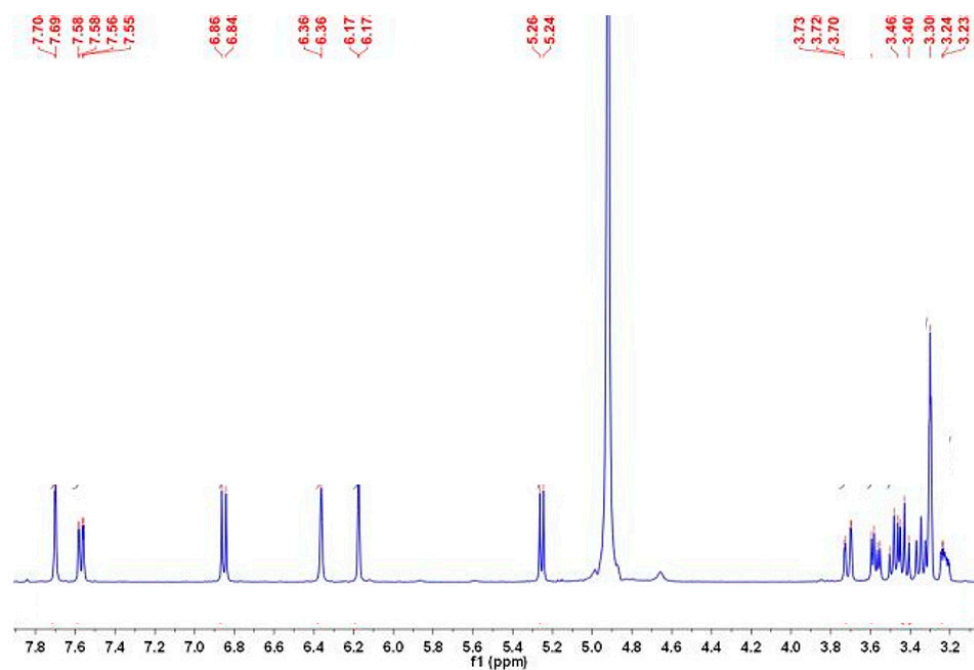

Figure S15. <sup>1</sup>H NMR spectrum of compound **7**.

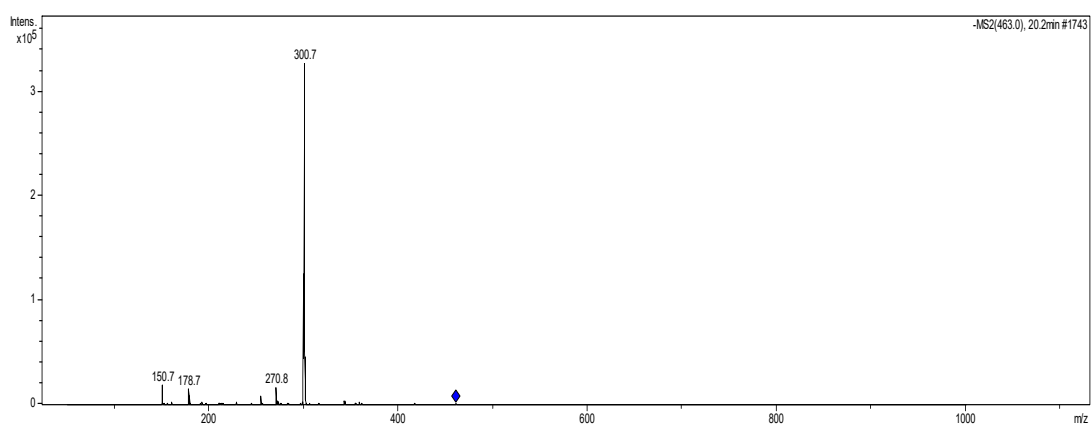

Figure S16. MS/MS spectrum of compound **7**.

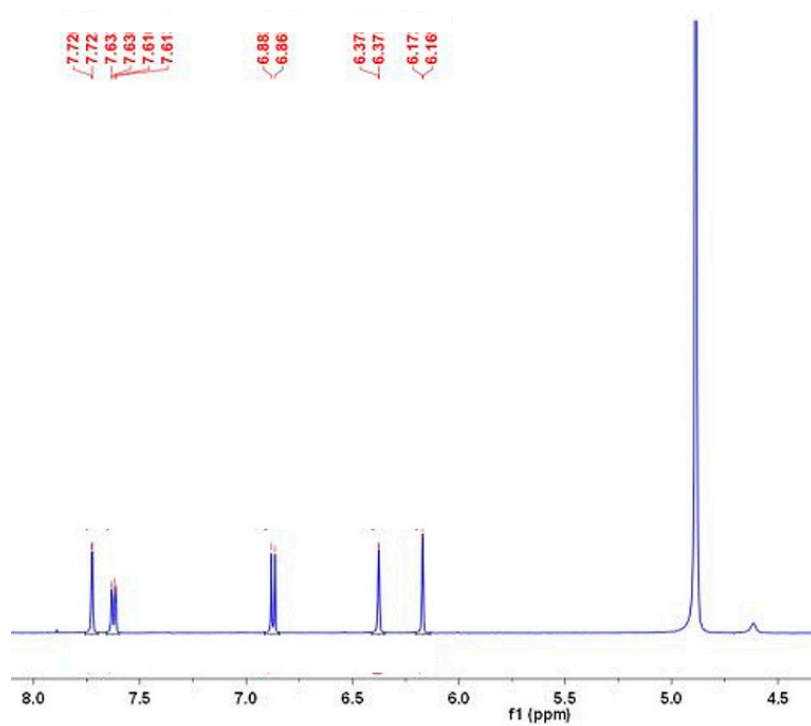

Figure S17. <sup>1</sup>H NMR spectrum of compound **8**.

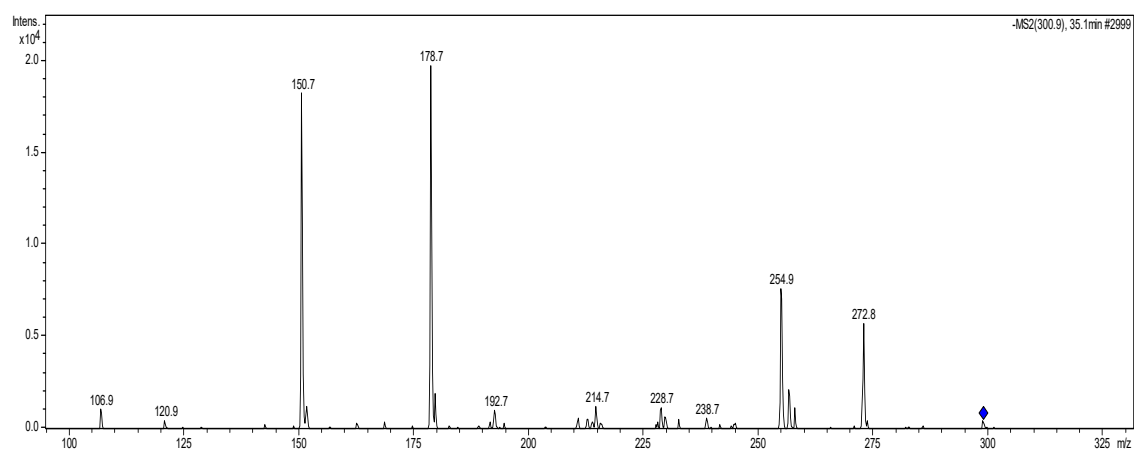

Figure S18. MS/MS spectrum of compound **8**.

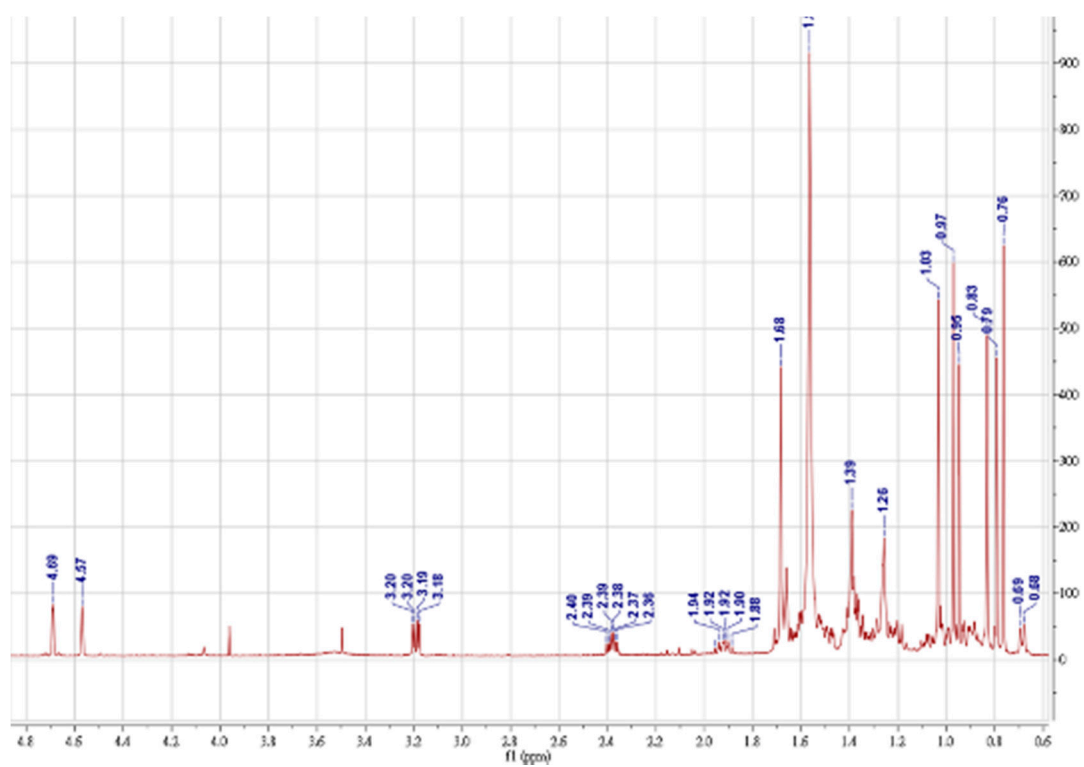

Figure S19. <sup>1</sup>H NMR spectrum of compound 9.

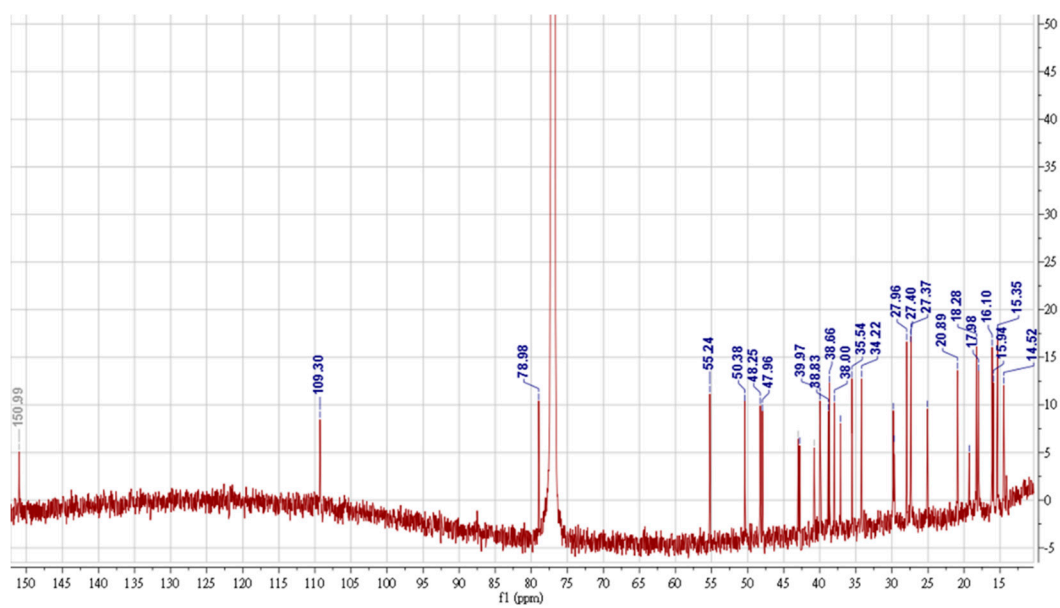

Figure S20. <sup>13</sup>C NMR spectrum of compound 9.

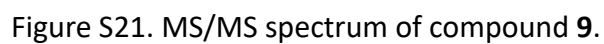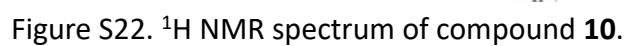

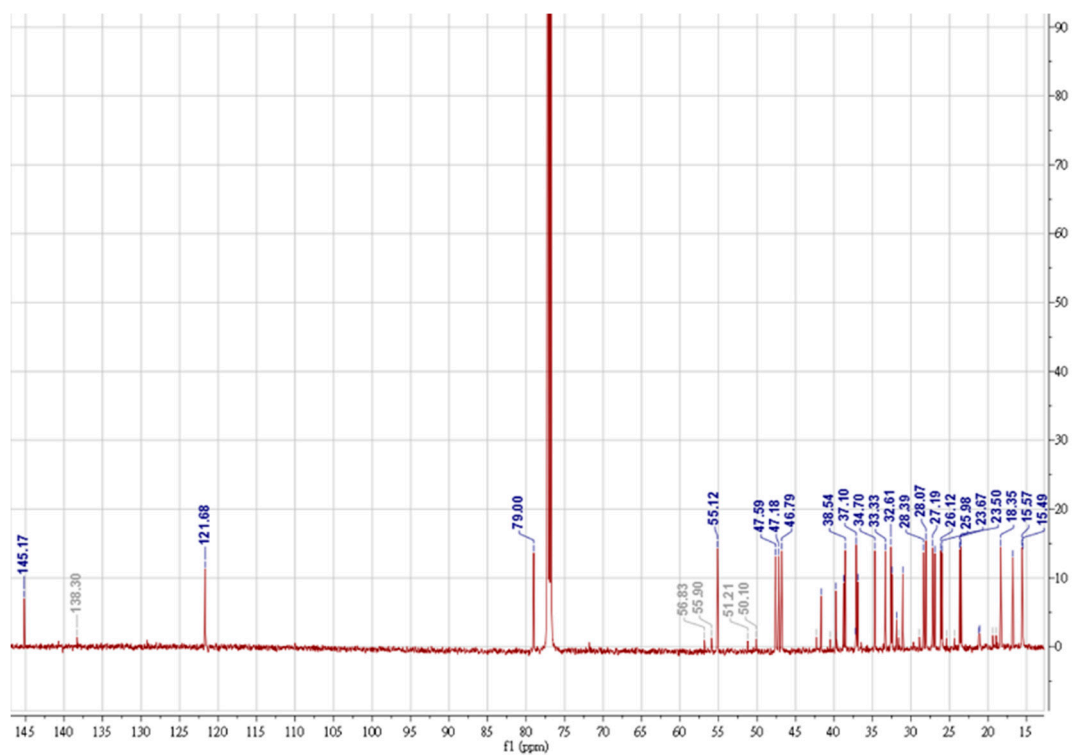

Figure S23. <sup>13</sup>C NMR spectrum of compound **10**.

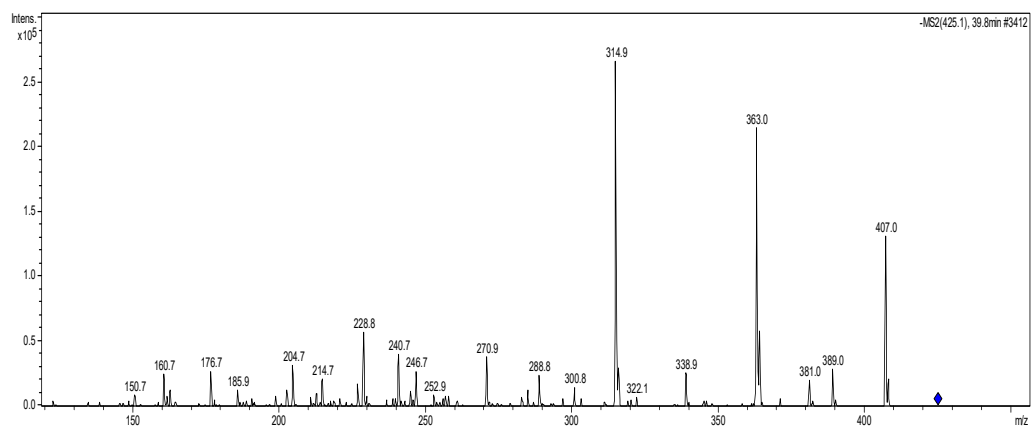

Figure S24. MS/MS spectrum of compound **10**.

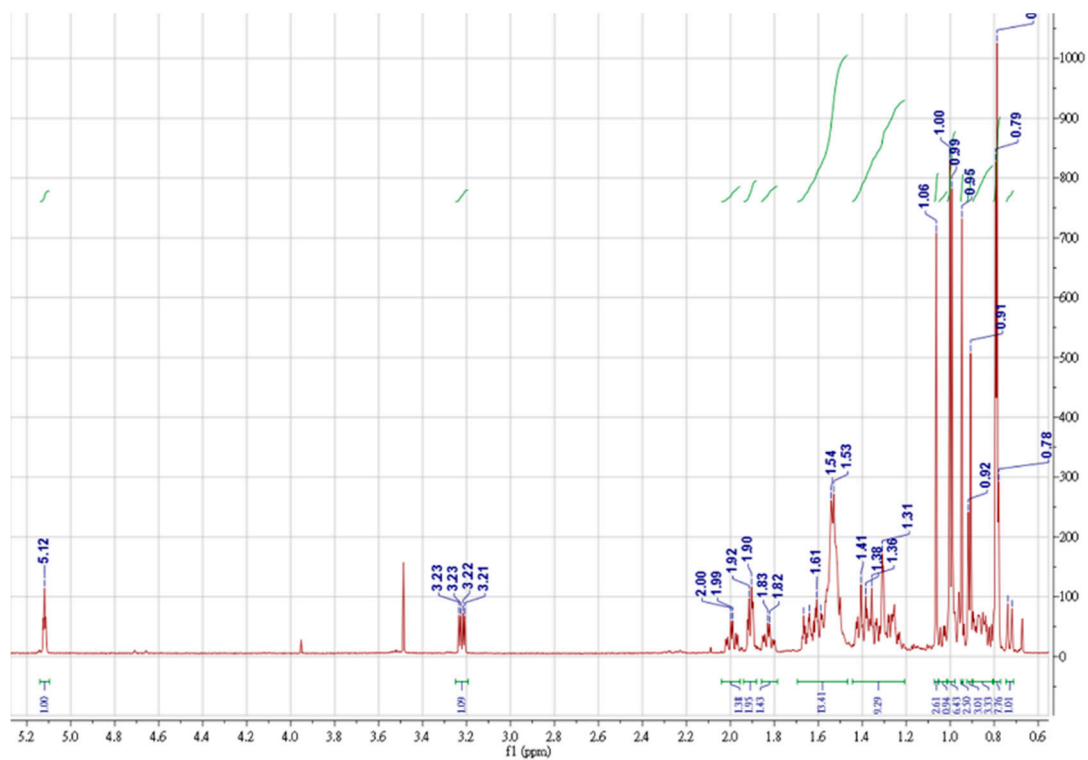

Figure S25. <sup>1</sup>H NMR spectrum of compound **11**.

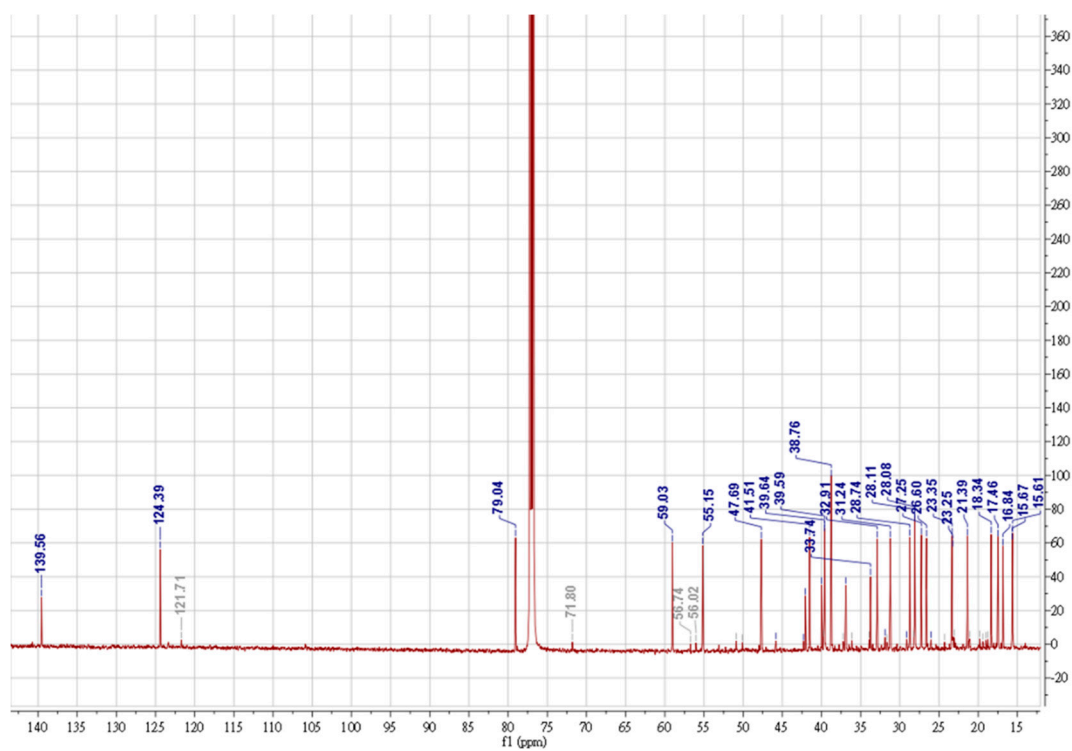

Figure S26. <sup>13</sup>C NMR spectrum of compound **11**.

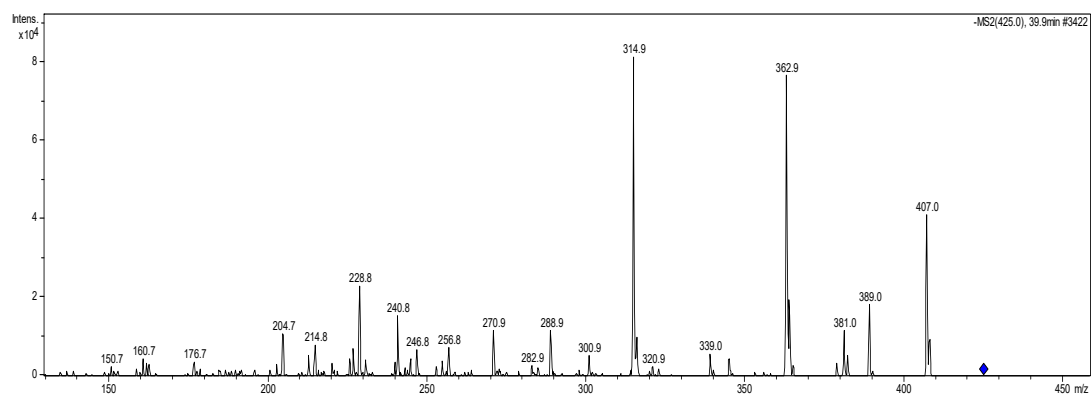

Figure S27. MS/MS spectrum of compound **11**.
